# Supplementary material for: Highly efficient cyclotrimerization of isocyanates using N-heterocyclic olefins under bulk conditions
Source: Royal Society of Chemistry journal article supplement (doi:10.1039/c9cc06402h), 2019-01-01
Supplement: c9cc06402h1.pdf [file c9cc06402h1.pdf]

# Highly efficient cyclotrimerization of isocyanates by N-Heterocyclic Olefins under bulk condition

*Chengkai Li,<sup>†</sup> Wuchao Zhao,<sup>†</sup> Jianghua He, and Yuetao Zhang<sup>\*</sup>*

State Key Laboratory of Supramolecular Structure and Materials, College of Chemistry,  
Jilin University, Changchun, Jilin 130012, China

---

<sup>†</sup> equal contribution role.

<sup>\*</sup> Corresponding author email: ytzhang2009@jlu.edu.cn

## Contents

|                                                                  |    |
|------------------------------------------------------------------|----|
| 1. Materials, reagents, and methods.....                         | 3  |
| 2. Synthesis and characterization of intermediates .....         | 5  |
| 3. In-situ NMR reactions. ....                                   | 11 |
| 4. Selected Data for the cyclotrimerization of isocyanates ..... | 13 |
| 5. Two possible catalytic pathways. ....                         | 15 |
| 6. The cyclotrimerization of diisocyanates.....                  | 16 |
| 7. $^1\text{H}$ NMR spectrum of cyclotrimerization products..... | 18 |
| 8. X-ray diffraction data.....                                   | 25 |
| 9. References .....                                              | 28 |

## 1. Materials, reagents, and methods.

All syntheses and manipulations of air- and moisture-sensitive materials were carried out in flamed Schlenk-type glassware on a dual-manifold Schlenk line, a high-vacuum line, or an argon-filled glovebox. Toluene and benzene were refluxed over sodium/potassium alloy, followed by distillation under nitrogen atmosphere; hexane, fluorene and dichloromethane were refluxed over  $\text{CaH}_2$ , followed by distillation under nitrogen atmosphere. Benzene- $d_6$  was dried over molecular sieves 4 Å, DMF was dried by  $\text{CaH}_2$ , followed by reduce pressure distillation under nitrogen atmosphere. All solvents were stored over molecular sieves 4 Å. NMR spectra were recorded on a Bruker Avance II 500 (500 MHz,  $^1\text{H}$ ; 126 MHz,  $^{13}\text{C}$ ) instrument at RT. Chemical shifts for  $^1\text{H}$  and  $^{13}\text{C}$  spectra were referenced to internal solvent resonances and are reported as parts per million relatives to  $\text{SiMe}_4$ . Air sensitive NMR samples were conducted in Teflon-valve sealed J. Young-type NMR tubes.

Isocyanates, 1,8-Diazabicyclo[5.4.0]undec-7-ene (DBU), and 7-Methyl-1,5,7-triazabicyclo[4.4.0]dec-5-ene (MTBD) were purchased from Energy Chemical. Ammonium hydroxide, potassium bis(trimethylsilyl)amide (KHMDs, 1.0 M solution in THF) and benzil were purchased from Titan. Iodomethane, isobutyraldehyde were purchased from Energy Chemical. Potassium hydride (30 wt. % dispersion in

mineral oil) was purchased from Alfa Aesar. All Chemicals were used as received.

**NHO1-3** were synthesized according to literatures.<sup>1-3</sup>

**General procedure for cyclotrimerization in toluene:** Under an argon atmosphere, 1.0 mmol PhNCO was added to an oven dried round bottom flask containing NHO solution in toluene and equipped with a magnetic stir bar. The reaction was stirred at room temperature (RT) up to quantitative precipitate was observed. The resulting precipitate was filtered, washed with hexane, and dried *in vacuo* to afford the isocyanurate as a white solid. Spectrums of products were compared to reported data.<sup>4-11</sup>

**General procedure for the cyclotrimerization of isocyanates under solvent-free condition:** Under an argon atmosphere, 10.0 mmol PhNCO was added to an oven dried round bottom flask containing **NHO3** solution in dry toluene (100  $\mu$ L) and a magnetic stir bar. The reaction was stirred at RT until the solution was solidified. The resulting products was dried *in vacuo* to afford the isocyanurate as a white solid.

**General procedure for cyclotrimerization of diisocyanates in DMF:** Under an argon atmosphere, 4.0 mmol diisocyanate was added to an oven dried round bottom flask containing 19 mL dry DMF and equipped with a magnetic stir bar. After 10 minutes, **NHO3** solution in DMF (1.0 mL) was added to above-mentioned round bottom flask. The reaction was stirred at RT until a gel is formed. The resulting products are purged with methanol und subsequently washed with Ethanol, THF and chloroform for one day

each, followed by a treatment with ethanol for 3 days, where the solvent was replaced every day.

**X-ray Crystallographic Analysis of INT<sub>39</sub>:** Single crystals were quickly covered with a layer of Paratone-N oil (Exxon, dried and degassed at 120 °C/10<sup>−6</sup> Torr for 24h) after decanting the mother liquor. A crystal was then mounted on a thin glass fiber and transferred into the cold nitrogen stream of a Bruker APEX-II CCD diffractometer. The structures were solved by direct methods and refined using the Bruker SHELXTL program library by full-matrix least-squares on F<sup>2</sup> for all reflections (SHELXTL, Version 6.12; Bruker Analytical X-ray Solutions: Madison, WI, 2001).

## 2. Synthesis and characterization of intermediates

**2.1 Synthesis and characterization of 2-(1,3-dimethyl-1,3-dihydro-2H-benzoimidazol-2-ylidene)-N<sup>1</sup>,N<sup>3</sup>-di-*m*-tolylmalonamide (INT<sub>13</sub>):** Under an argon atmosphere, 1.0 mmol isocyanates **3** was added to an oven dried round bottom flask containing **NHO1** solution in dry toluene (0.5 mmol, 5 mL) at -36 °C (in the freezer of glovebox). After 5 minutes, the resulting precipitate was filtrated and washed with hexane, then dried *in vacuo* to afford **INT<sub>13</sub>** as a white solid. <sup>1</sup>H NMR (500 MHz, Benzene-*d*<sub>6</sub>) δ 7.61 (s, 2H, CONH), 7.13 – 7.04 (m, 6H, Ar-*H*), 6.83 (dd, *J* = 6.1, 3.1 Hz, 2H, Ar-*H*), 6.70 (d, *J* = 7.5 Hz, 2H, Ar-*H*), 6.48 (dd, *J* = 6.0, 3.2 Hz, 2H,

Ar-*H*), 3.08 (s, 6H, *NMe*), 2.13 (s, 6H, Ar-*Me*).  $^{13}\text{C}$  NMR (126 MHz,  $\text{C}_6\text{D}_6$ )  $\delta$  151.3, 138.1, 130.0, 129.4, 128.6, 128.5, 128.0, 127.9, 127.9, 127.7, 127.7, 127.5, 127.5, 127.2, 70.9, 34.2, 21.3.

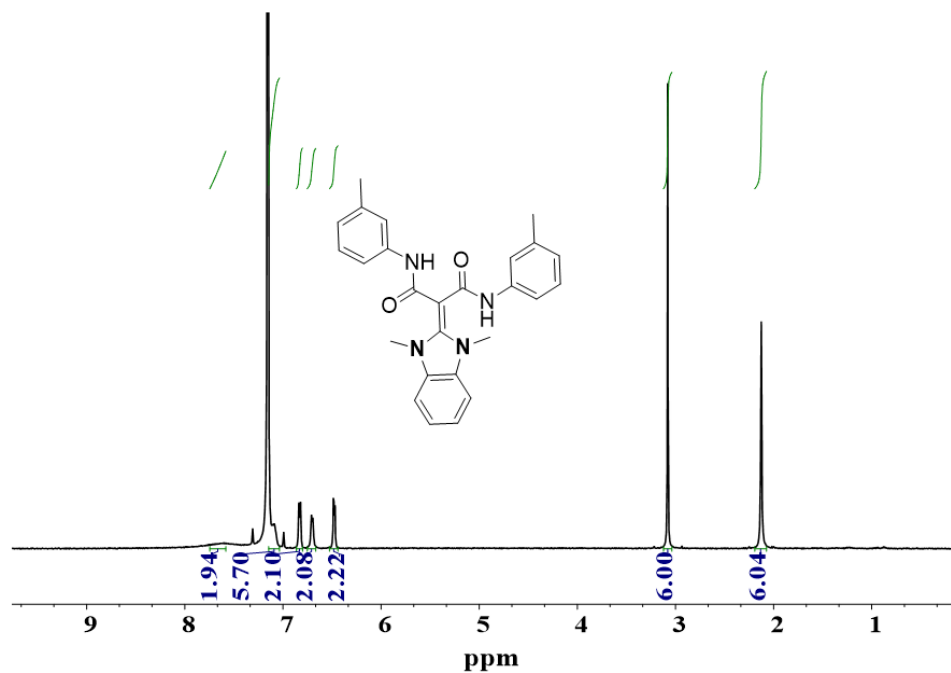

**Fig S1.**  $^1\text{H}$  NMR spectrum of **INT**<sub>13</sub> (500 MHz,  $\text{Benzene-}d_6$ ).

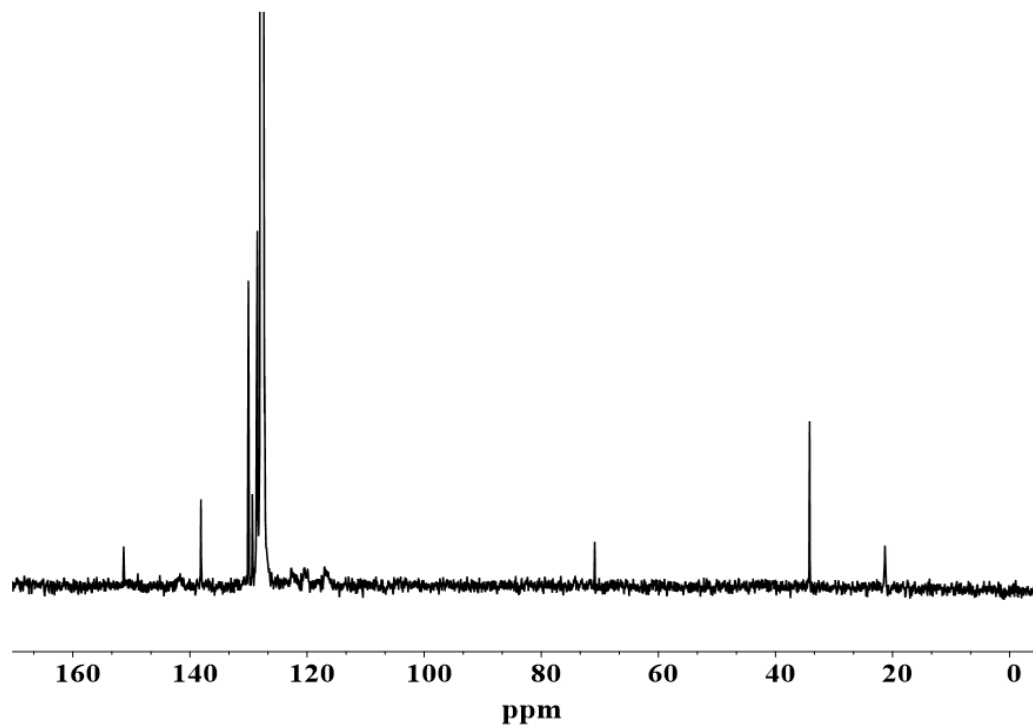

**Fig S2.**  $^{13}\text{C}$  NMR spectrum of **INT**<sub>13</sub> (126 MHz, Benzene-*d*<sub>6</sub>).

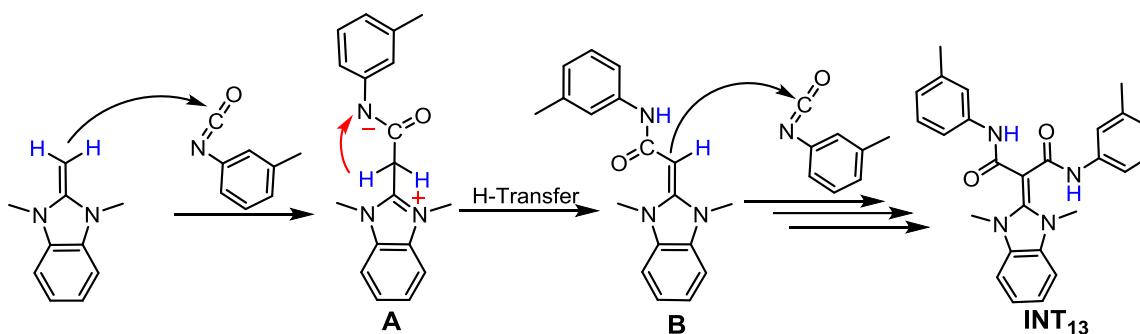

**Scheme S1.** Pathway for the reaction of isocyanate **3** with **NHO1**.

**2.2 Synthesis and characterization of 2-(1,3-dimethyl-4,5-diphenyl-1,3-dihydro-2H-imidazol-2-ylidene)-N-(*m*-tolyl)propan amide (**INT**<sub>23</sub>).** Under an argon atmosphere, 1.0 mmol **3** was added to an oven dried

round bottom flask containing **NHO2** solution in dry toluene (1.0 mmol, 5 mL) at -36 °C (in the freezer of glovebox). The reaction was kept at -36 °C for 2 h. Then 3 mL dry hexane was added, the resulting precipitate was filtrated and dried *in vacuo* to afford the **INT<sub>23</sub>** as yellow solid. <sup>1</sup>H NMR (500 MHz, Benzene-*d*<sub>6</sub>) δ 7.95 (s, 1H, CONH), 7.89 (d, *J* = 8.1 Hz, 1H, Ar-*H*), 7.31 (s, 1H, Ar-*H*), 7.27 (t, *J* = 7.8 Hz, 1H, Ar-*H*), 6.96 – 6.90 (m, 9H, Ar-*H*), 6.84 – 6.78 (m, 2H, Ar-*H*), 2.97 (s, 6H, NMe), 2.28 (s, 3H, CMe), 2.00 (s, 3H, Me). <sup>13</sup>C NMR (126 MHz, C<sub>6</sub>D<sub>6</sub>) δ 164.8, 158.0, 142.7, 138.0, 129.4, 129.2, 129.0, 128.6, 128.5, 128.2, 127.9, 127.7, 127.5, 121.3, 119.2, 115.8, 60.2, 36.0, 21.5, 16.1. (These spectrums contains a small amount of hexane and toluene.)

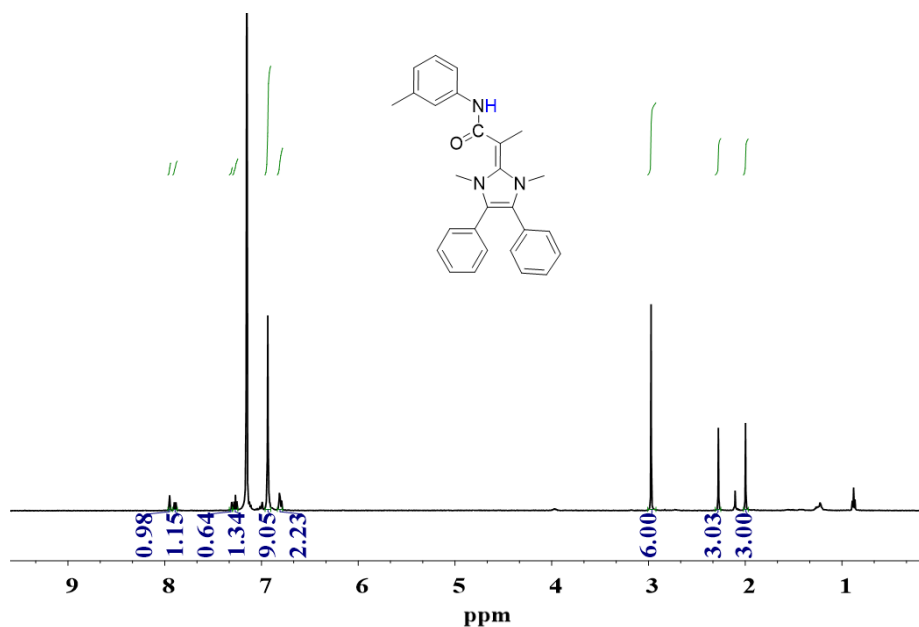

**Fig S3.** <sup>1</sup>H NMR spectrum of **INT<sub>23</sub>** (500 MHz, Benzene-*d*<sub>6</sub>).



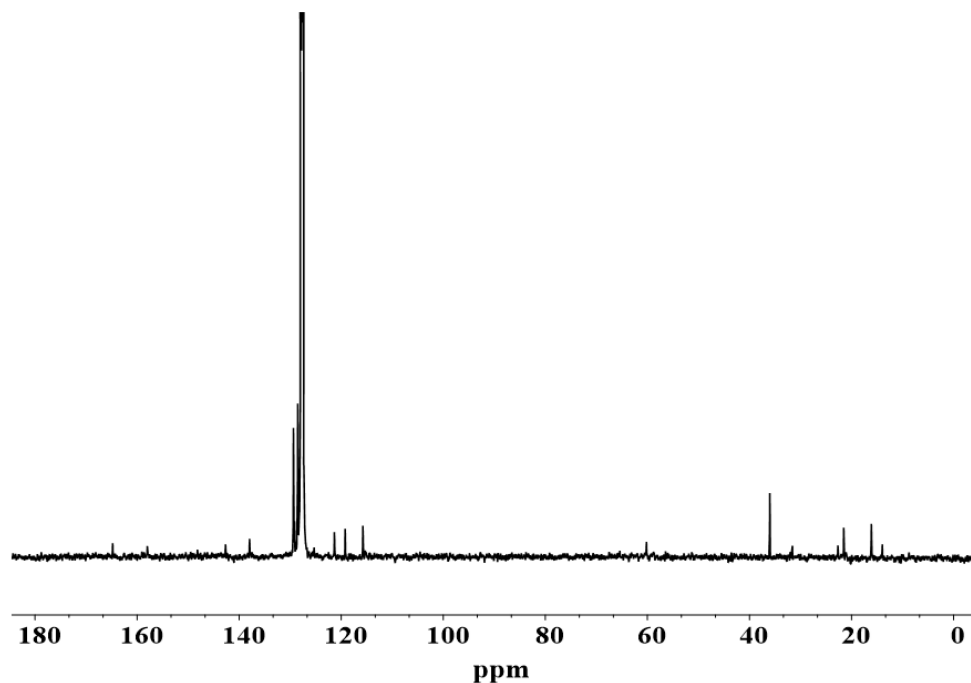

**Fig S4.**  $^{13}\text{C}$  NMR spectrum of **INT**<sub>23</sub> (126 MHz, Benzene-*d*<sub>6</sub>).

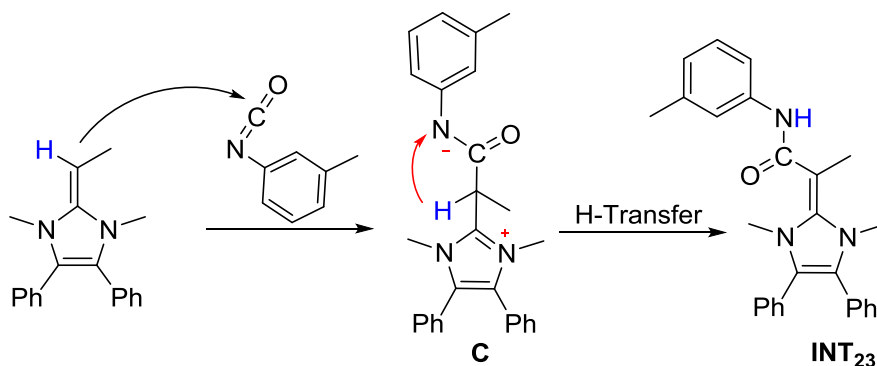

**Scheme S2.** Pathway for the reaction of isocyanate **3** with **NHO2**.

**2.3 Synthesis and characterization of (2-(1,3-dimethyl-4,5-diphenyl-1H-imidazol-3-ium-2-yl)-2-methylpropanoyl)(4-fluorophenyl)amide (**INT**<sub>39</sub>).** Under an argon atmosphere, 1.0 mmol **9** was added to an oven dried round bottom flask containing **NHO3** solution in dry toluene (1.0 mmol, 5 mL) at -36 °C (in the freezer of glovebox).

The reaction was kept at -36 °C for 12 h. Then 2 mL dry hexane was added, the resulting precipitate was filtrated and dried *in vacuo* to afford the **INT**<sub>39</sub> as off-white solid. And the single crystals were obtained by diffusion of hexane into a fluorobenzene solution. <sup>1</sup>H NMR (500 MHz, Benzene-*d*<sub>6</sub>) δ 8.40 – 8.32 (m, 2H, Ar-*H*), 7.08 – 7.02 (m, 3H, *Ph*), 6.86 – 6.81 (m, 4H, *Ph*), 6.75 (d, *J* = 8.5 Hz, 2H, Ar-*H*), 6.63 (d, *J* = 7.0 Hz, 3H, *Ph*), 3.14 (s, 6H, *NMe*), 1.86 (s, 6H, *Me*). <sup>13</sup>C NMR (126 MHz, Benzene-*d*<sub>6</sub>) δ 171.77, 157.87, 154.91, 151.02, 148.60, 131.40, 131.27, 131.00 – 130.53 (m), 130.42, 129.33, 128.97, 128.55, 126.06, 125.21 – 124.95 (m), 115.85 (d, *J* = 23.0 Hz), 114.12 (d, *J* = 20.4 Hz), 49.10, 34.69, 27.06. (These spectrums contains a small amount of fluorobenzene.)

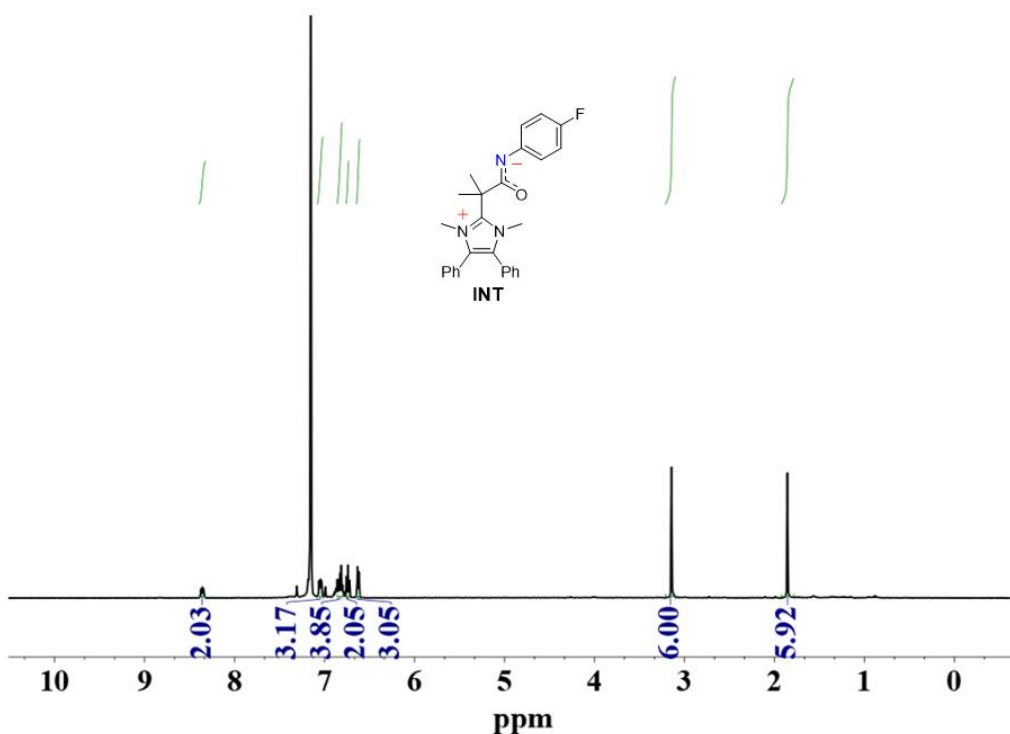

**Fig S5.** <sup>1</sup>H NMR spectrum of **INT**<sub>39</sub> (500 MHz, Benzene-*d*<sub>6</sub>).

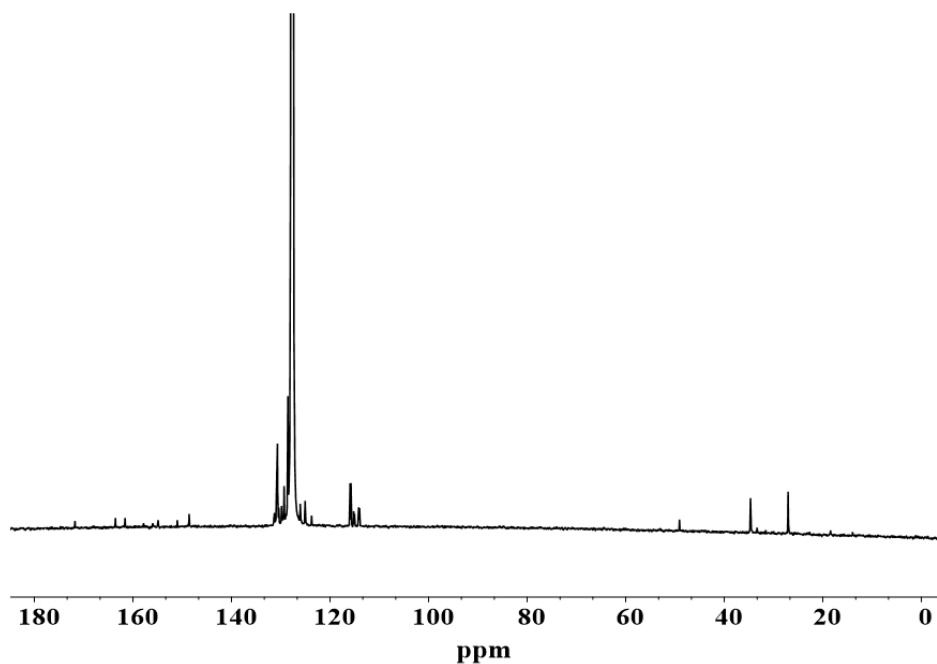

**Fig S6.**  $^{13}\text{C}$  NMR spectrum of **INT**<sub>39</sub> (126 MHz, Benzene- $d_6$ ).

### 3. In-situ NMR reactions.

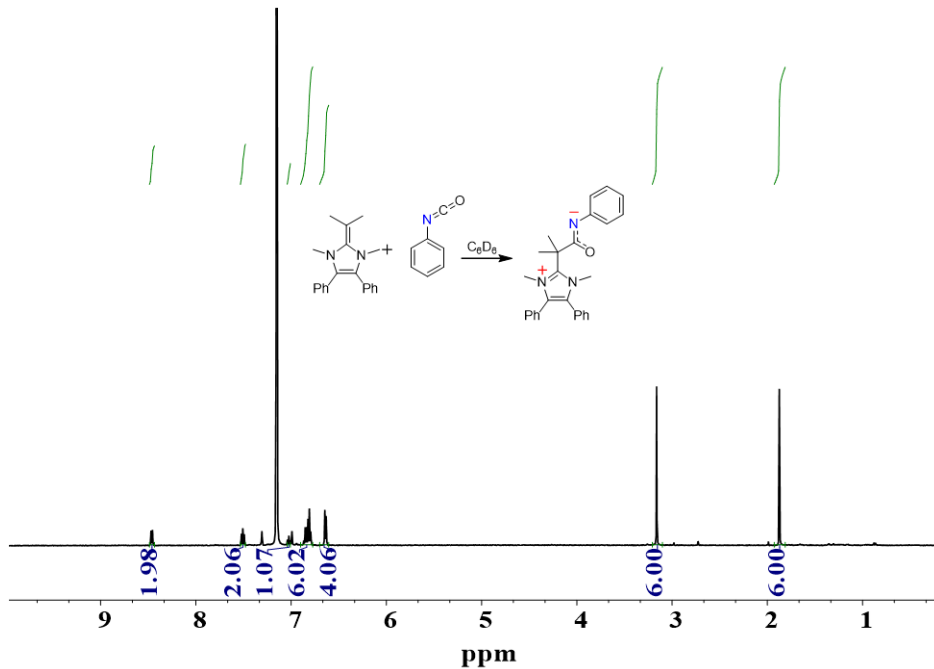

**Fig S7.**  $^1\text{H}$  NMR spectrum of reaction of **1**: **NHO3** = 1:1 (500 MHz, Benzene- $d_6$ ).

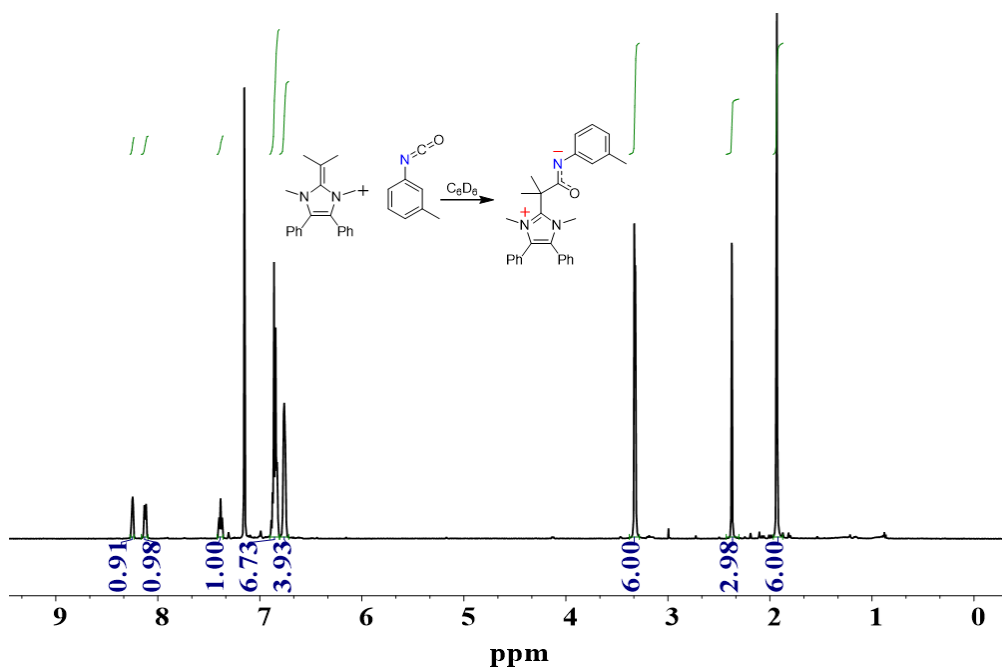

**Fig S8.** <sup>1</sup>H NMR spectrum of reaction of **3**: **NHO3** = 1:1 (500 MHz, Benzene-*d*<sub>6</sub>).

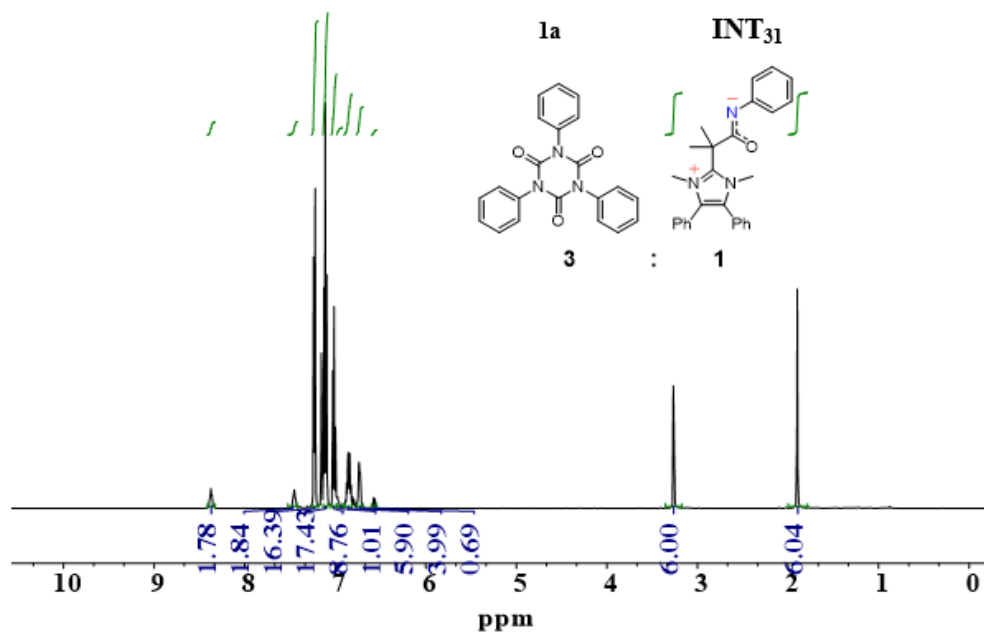

**Fig S9.** <sup>1</sup>H NMR spectrum of reaction of **1**: **NHO3** = 10:1 (500 MHz, Benzene-*d*<sub>6</sub>).

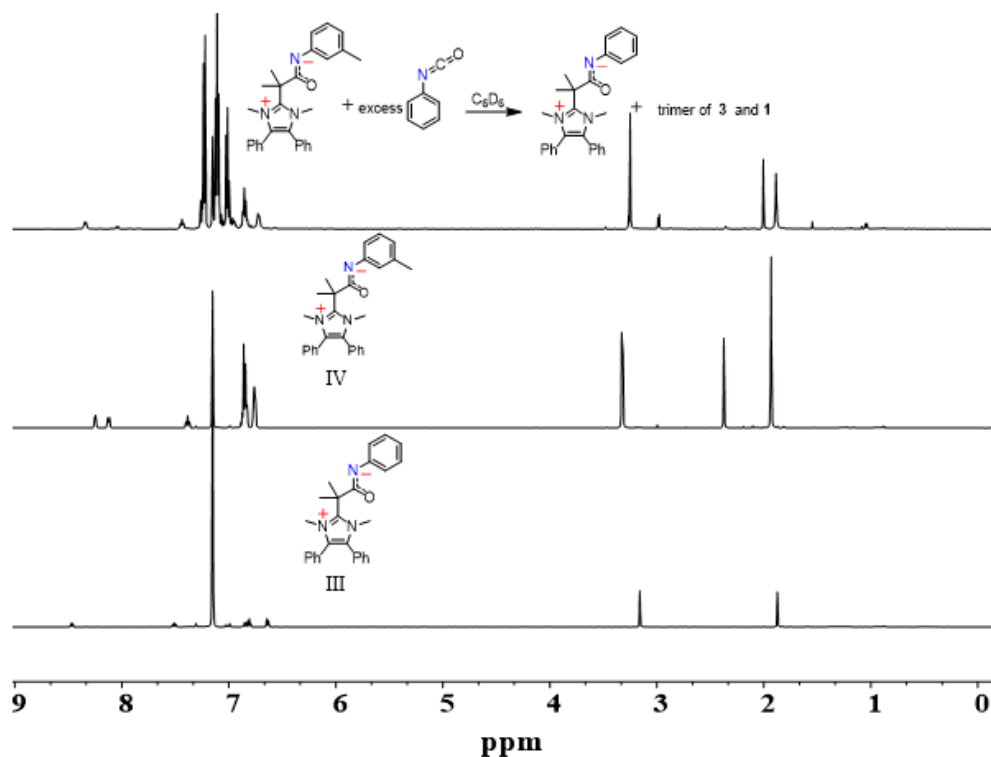

**Fig S10.**  $^1\text{H}$  NMR spectrum of reaction of **INT**<sub>33</sub>: **1** = 1:10 (500 MHz,  $\text{Benzene-}d_6$ ).

#### 4. Selected Data for the cyclotrimerization of isocyanates

**Table S1.** NHO-catalyzed cyclotrimerization of isocyanates.<sup>a</sup>

| Run | RNCO     | NHO         | RNCO:NHO | Time/min | Product. <sup>b</sup> | Yield. <sup>c</sup> (%) |
|-----|----------|-------------|----------|----------|-----------------------|-------------------------|
| 1   | <b>1</b> | <b>NHO1</b> | 100      | 1440     | <b>1a</b>             | 0                       |
| 2   | <b>3</b> | <b>NHO1</b> | 100      | 1440     | <b>3a</b>             | 0                       |
| 3   | <b>1</b> | <b>NHO2</b> | 100      | 3        | <b>1a</b>             | 98                      |
| 4   | <b>3</b> | <b>NHO2</b> | 100      | 3        | <b>3a</b>             | 97                      |
| 5   | <b>5</b> | <b>NHO2</b> | 100      | 5        | <b>5a</b>             | 98                      |

<sup>a</sup> Condition: carried out in toluene at RT;  $[\text{RNCO}]_0 = 1.0 \text{ M}$ . <sup>b</sup> Cyclotrimer product. <sup>c</sup> Isolated yield.

**Table S2.** The cyclotrimerization of isocyanates catalyzed by NHOs in toluene.<sup>a</sup>

| Run             | RNCO      | RNCO:NHO3 | Time/min | Product <sup>b</sup> | Yield. <sup>c</sup> (%) |
|-----------------|-----------|-----------|----------|----------------------|-------------------------|
| 1               | <b>1</b>  | 100       | <1       | <b>1a</b>            | 97                      |
| 2               | <b>1</b>  | 2500      | <1       | <b>1a</b>            | 98                      |
| 3               | <b>2</b>  | 100       | 30       | <b>2a</b>            | 90                      |
| 4               | <b>3</b>  | 100       | <1       | <b>3a</b>            | 95                      |
| 5               | <b>4</b>  | 100       | 30       | <b>4a</b>            | 94                      |
| 6               | <b>5</b>  | 100       | 2        | <b>5a</b>            | 97                      |
| 7               | <b>6</b>  | 100       | 3        | <b>6a</b>            | 97                      |
| 8               | <b>7</b>  | 100       | 3        | <b>7a</b>            | 96                      |
| 9               | <b>8</b>  | 100       | 3        | <b>8a</b>            | 95                      |
| 10              | <b>9</b>  | 100       | 1440     | <b>9a</b>            | 0                       |
| 11              | <b>10</b> | 100       | 5        | <b>10a</b>           | 95                      |
| 12              | <b>11</b> | 100       | 48h      | <b>11a</b>           | 92                      |
| 13              | <b>12</b> | 100       | 96h      | <b>12a</b>           | 90                      |
| 14 <sup>c</sup> | <b>1</b>  | 100       | 48h      | <b>1a</b>            | 0                       |
| 15 <sup>d</sup> | <b>1</b>  | 100       | 3h       | <b>1a</b>            | 80                      |

<sup>a</sup> Condition: carried out in toluene at RT; [RNCO]<sub>0</sub> = 1.0 M. <sup>b</sup> Cyclotrimer product. <sup>c</sup> DBU was used. <sup>d</sup> MTBD was used as catalyst. <sup>e</sup> Isolated yield.

**Table S3.** The cyclotrimerization of isocyanates catalyzed by intermediates.<sup>a</sup>

| Run | RNCO     | Catalyst          | RNCO:Cata | Product. <sup>b</sup> | Time/min | Yield. <sup>c</sup> (%) |
|-----|----------|-------------------|-----------|-----------------------|----------|-------------------------|
| 1   | <b>1</b> | INT <sub>13</sub> | 100       | <b>1a</b>             | 1440     | 0                       |
| 2   | <b>1</b> | INT <sub>23</sub> | 100       | <b>1a</b>             | 3        | 98                      |
| 3   | <b>3</b> | INT <sub>23</sub> | 100       | <b>3a</b>             | 5        | 98                      |
| 4   | <b>5</b> | INT <sub>23</sub> | 100       | <b>5a</b>             | 5        | 97                      |
| 5   | <b>1</b> | INT <sub>39</sub> | 200       | <b>1a</b>             | 2        | 95                      |

<sup>a</sup> Condition: carried out in toluene at RT; [RNCO]<sub>0</sub> = 1.0 M. <sup>b</sup> Cyclotrimer product. <sup>c</sup> Isolated yield.

**Table S4.** The cyclotrimerization of diisocyanates catalyzed by NHO3. <sup>a</sup>

| Run | RNCO | Solvent | RNCO:NHO | Time/min | Product | Yield. <sup>b</sup> (%) |
|-----|------|---------|----------|----------|---------|-------------------------|
|-----|------|---------|----------|----------|---------|-------------------------|

|   |           |     |     |      |           |    |
|---|-----------|-----|-----|------|-----------|----|
| 1 | <b>15</b> | DMF | 100 | 120  | <b>P1</b> | 90 |
| 2 | <b>16</b> | DMF | 100 | 2880 | <b>P2</b> | 79 |
| 3 | <b>17</b> | DMF | 100 | 120  | <b>P3</b> | 85 |

<sup>a</sup> Condition: carried out in DMF at RT; [RNCO]<sub>0</sub> = 0.2 M. <sup>b</sup> Isolated yield.

## 5. Two possible catalytic pathways.

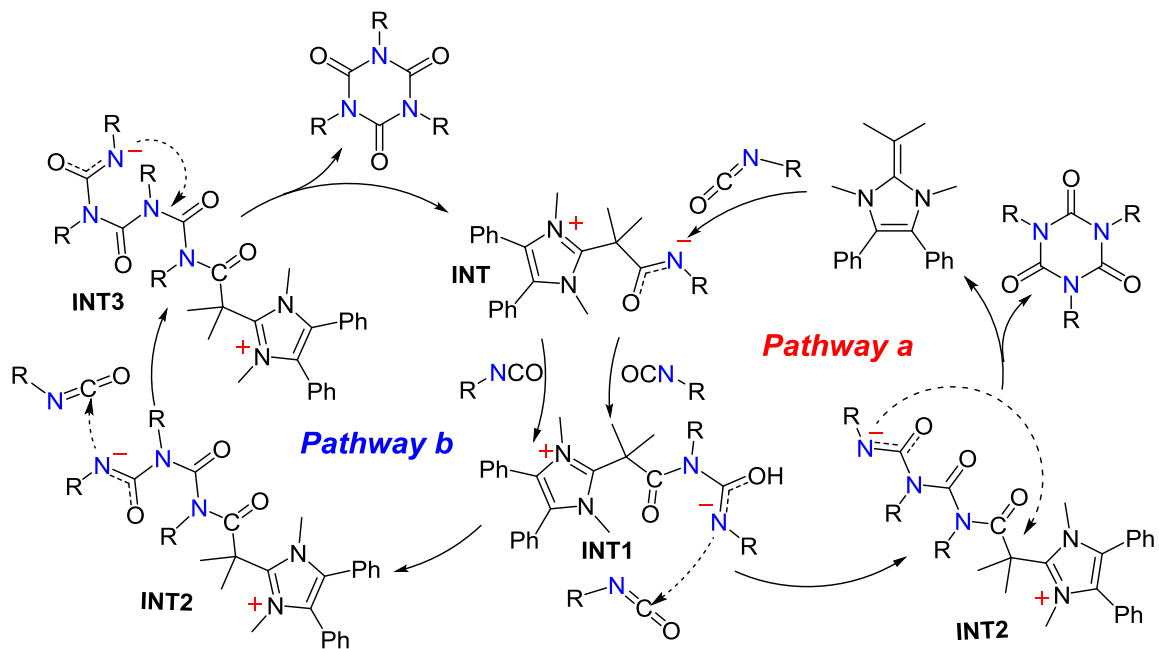

**Scheme S3.** Proposed catalytic mechanism for cyclotrimerization of isocyanates catalyzed by **NHO3**.

## 6. The cyclotrimerization of diisocyanates.

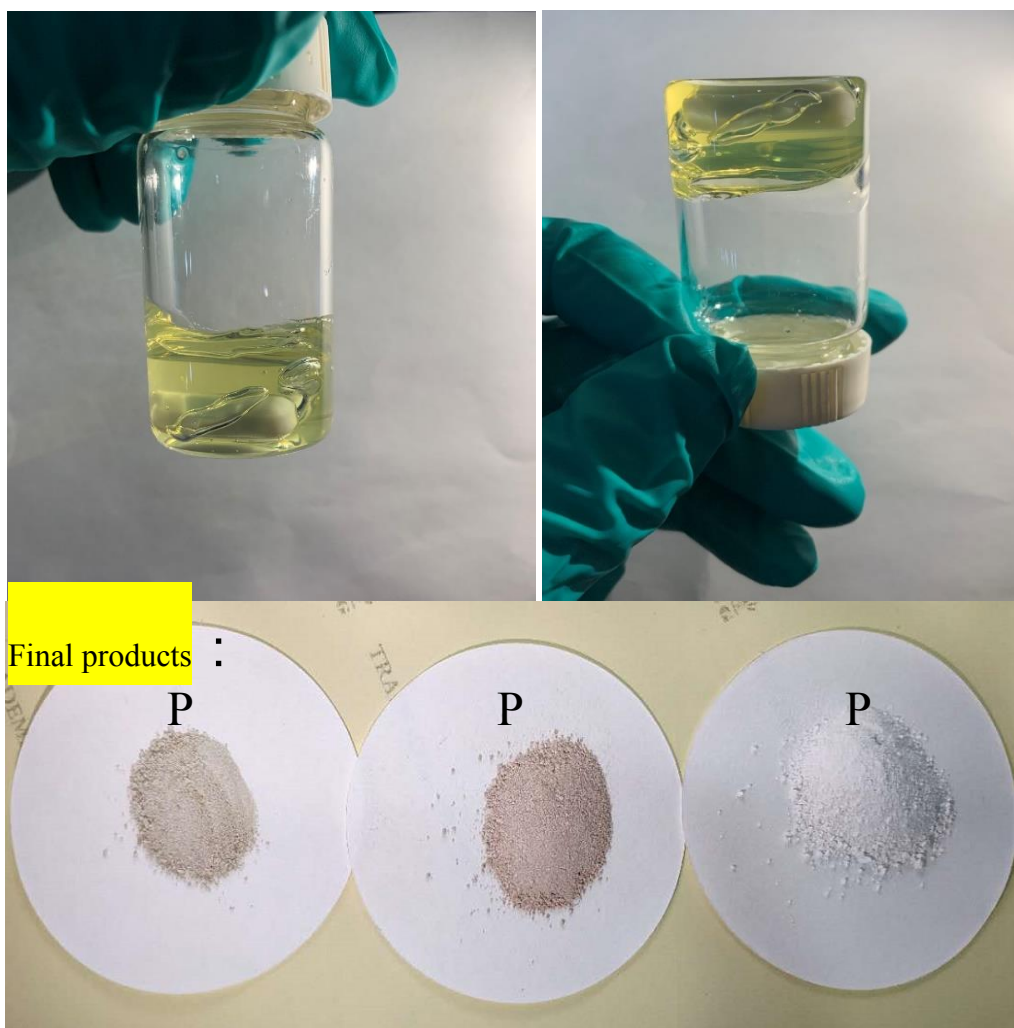

**Fig S11.** Reaction vials of cyclotrimerization of diisocyanates and final products.



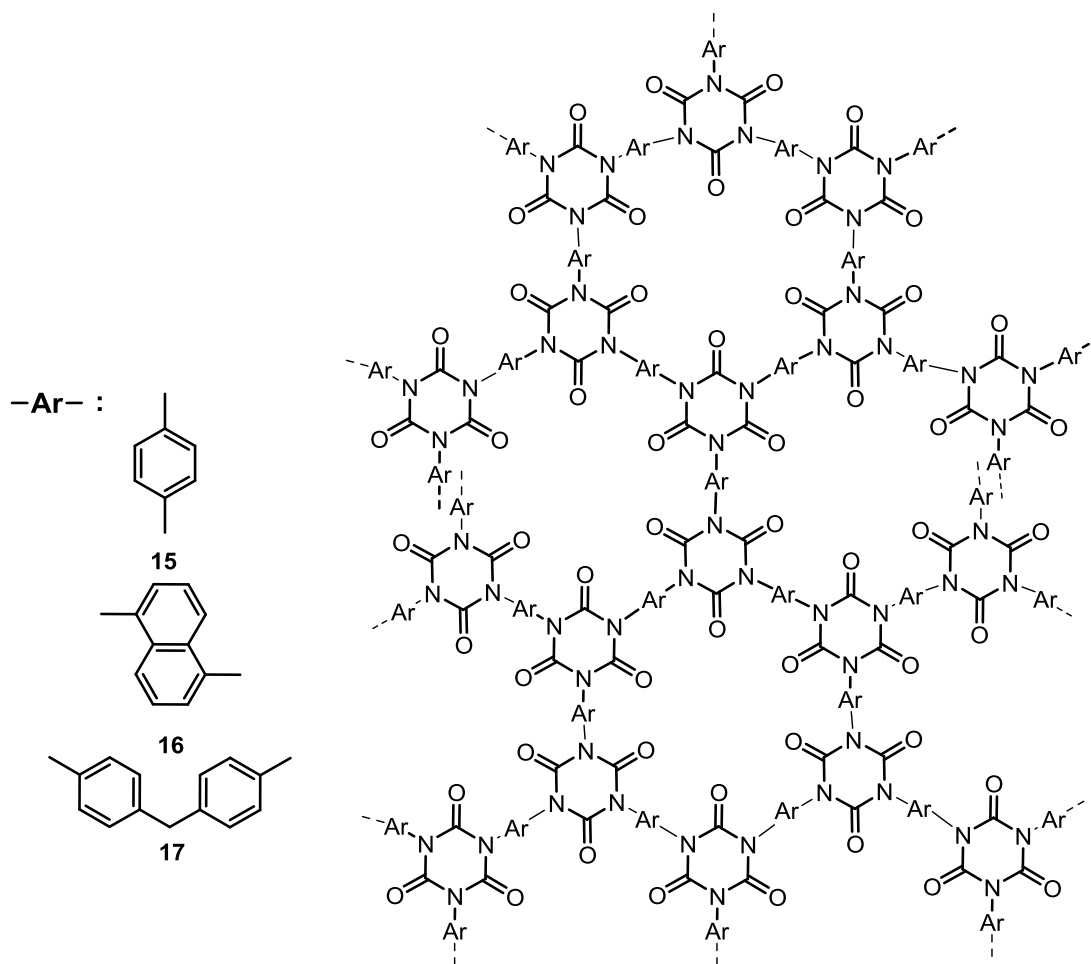

**Scheme S4.** Structure of microporous polyisocyanurates.

## 7. $^1\text{H}$ NMR spectrum of cyclotrimerization products

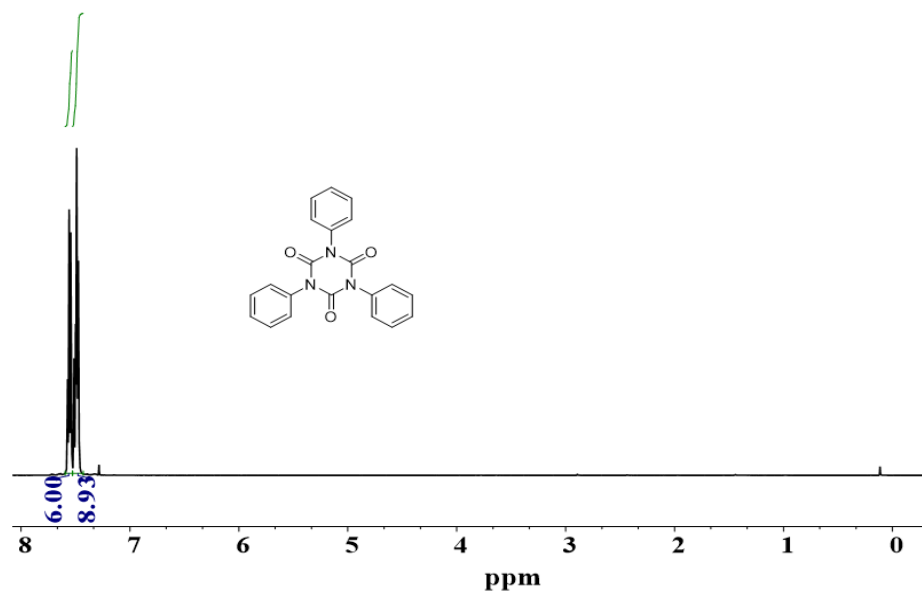

**Fig S12.**  $^1\text{H}$  NMR spectrum of **1a** (500 MHz, chloroform-*d*).

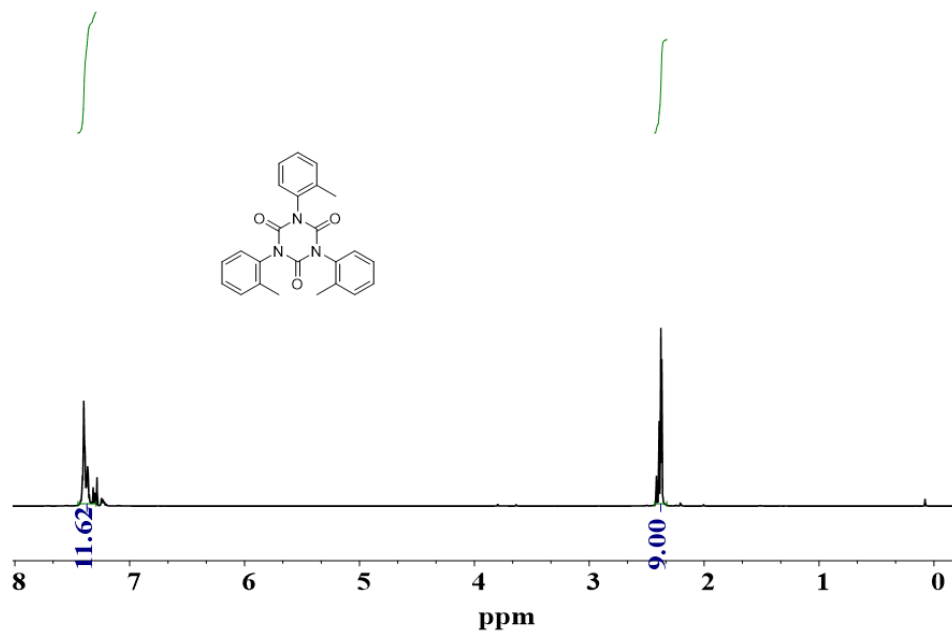

**Fig S13.**  $^1\text{H}$  NMR spectrum of **2a** (500 MHz, chloroform-*d*).

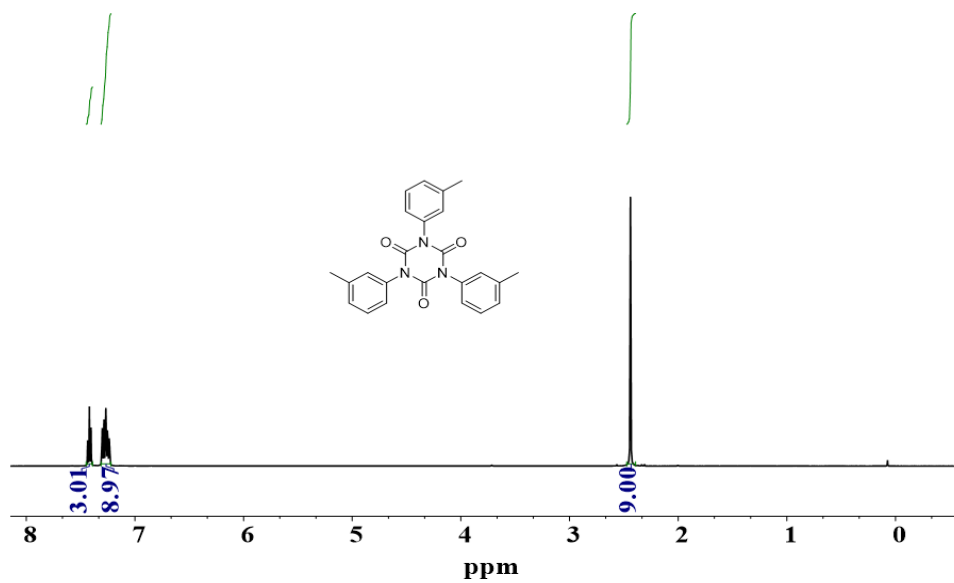

**Fig S14.** <sup>1</sup>H NMR spectrum of **3a** (500 MHz, chloroform-*d*).

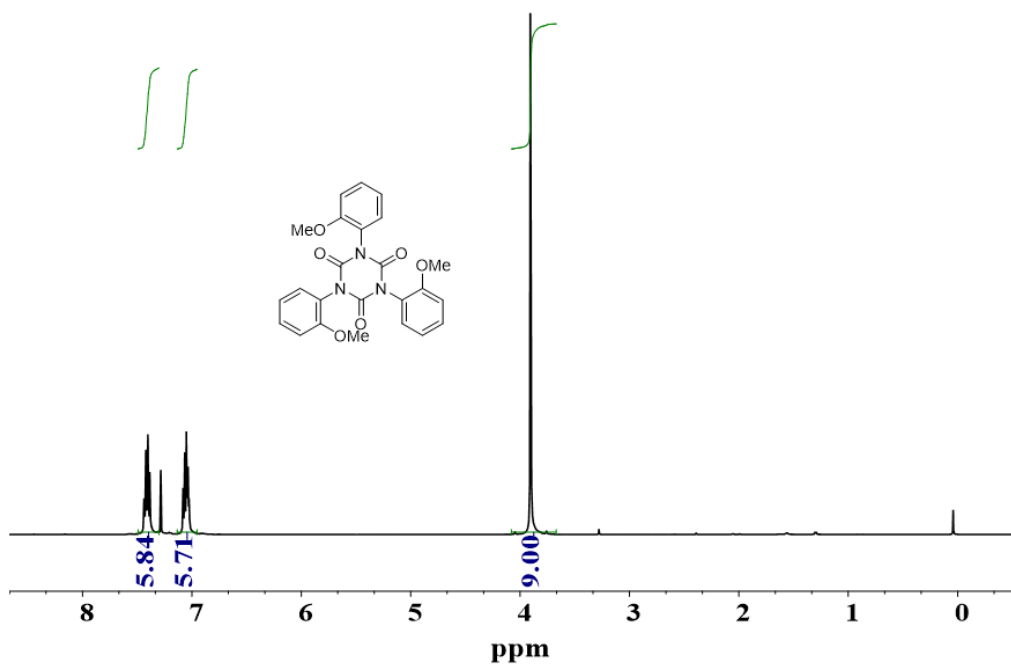

**Fig S15.** <sup>1</sup>H NMR spectrum of **4a** (500 MHz, chloroform-*d*).

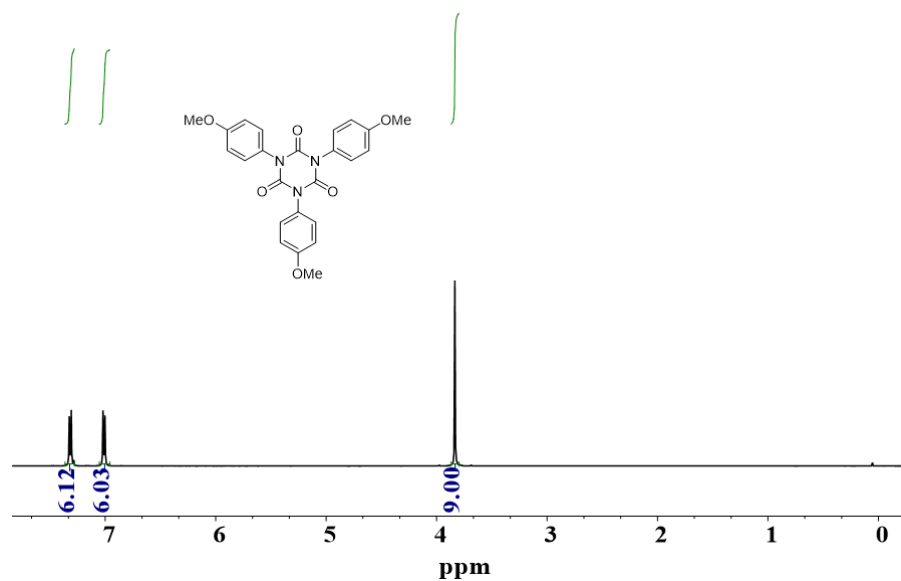

**Fig S16.** <sup>1</sup>H NMR spectrum of **5a** (500 MHz, chloroform-*d*).

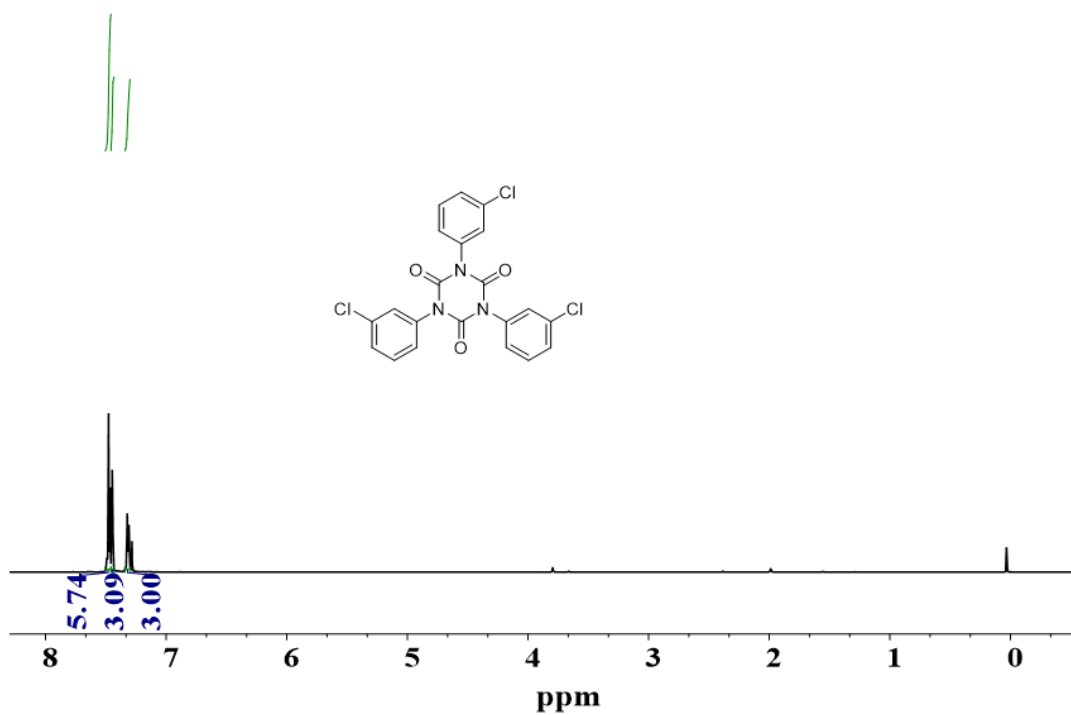

**Fig S17.** <sup>1</sup>H NMR spectrum of **6a** (500 MHz, chloroform-*d*).

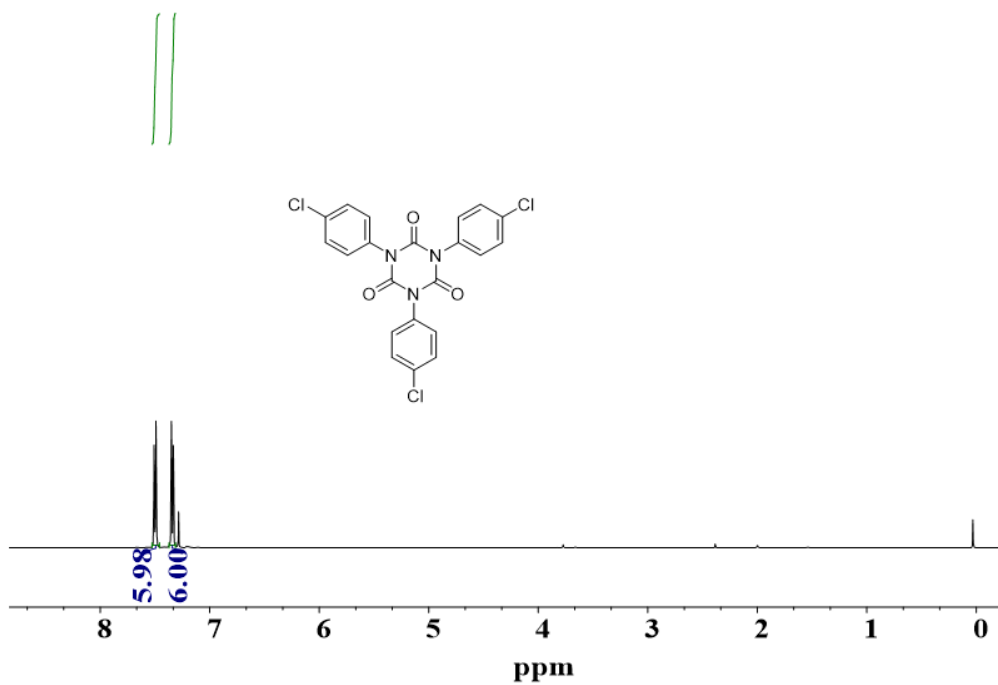

**Fig S18.** <sup>1</sup>H NMR spectrum of **7a** (500 MHz, chloroform-*d*).

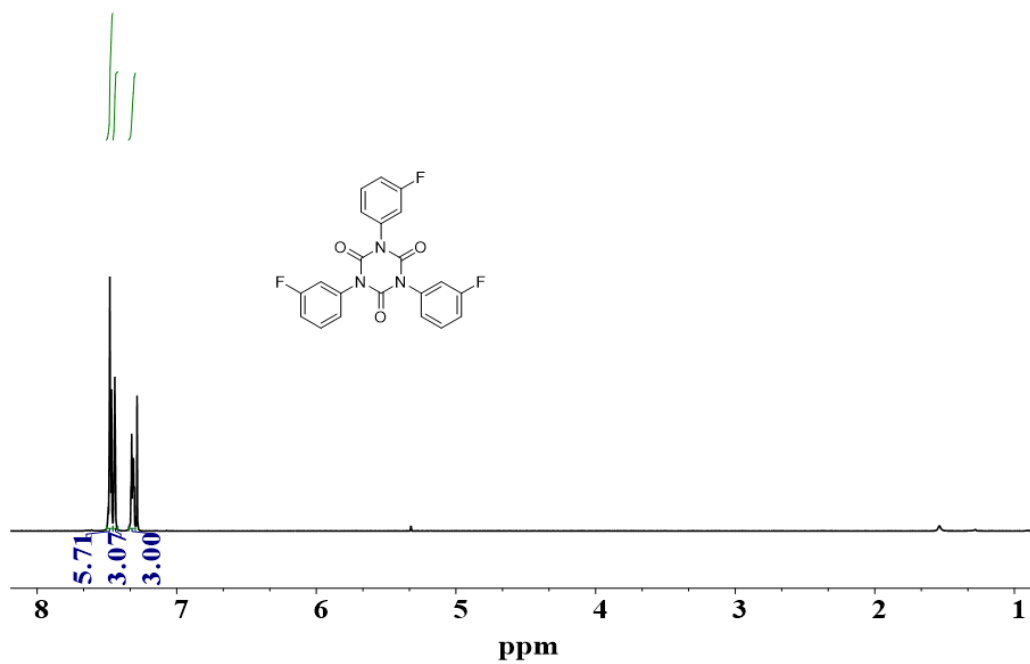

**Fig S19.** <sup>1</sup>H NMR spectrum of **8a** (500 MHz, chloroform-*d*).

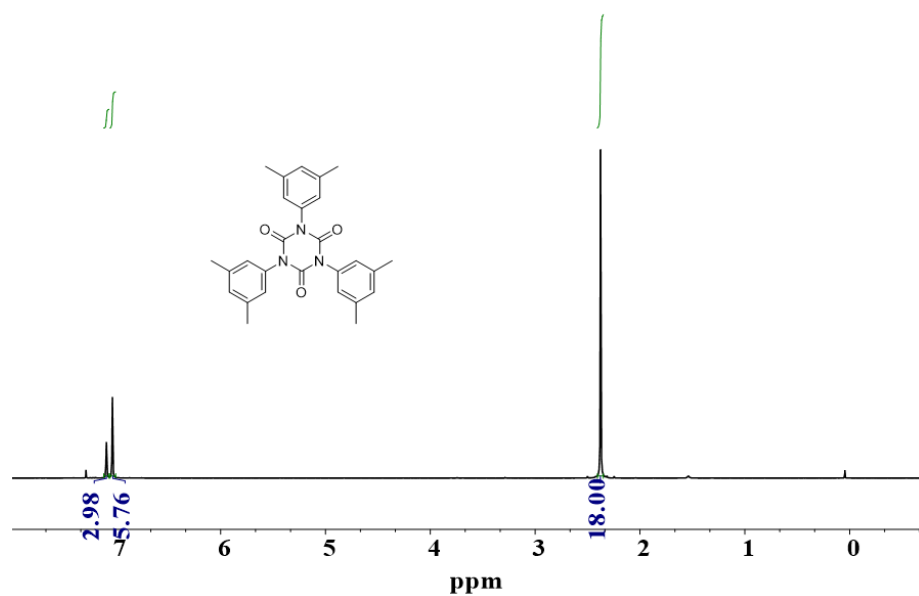

**Fig S20.** <sup>1</sup>H NMR spectrum of **10a** (500 MHz, chloroform-*d*).

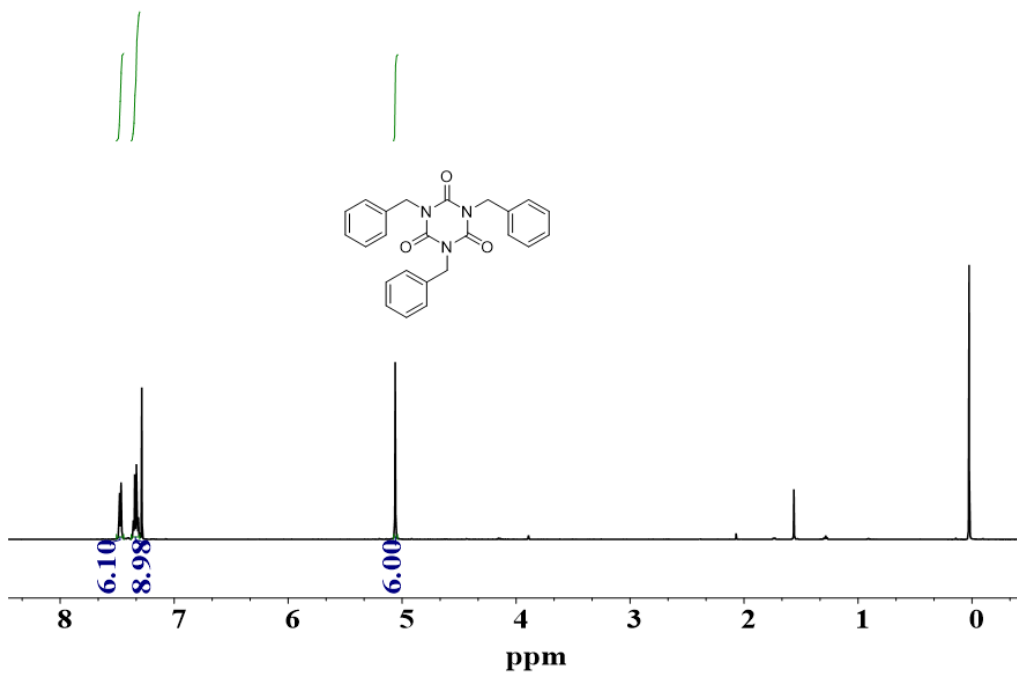

**Fig S21.** <sup>1</sup>H NMR spectrum of **11a** (500 MHz, chloroform-*d*).

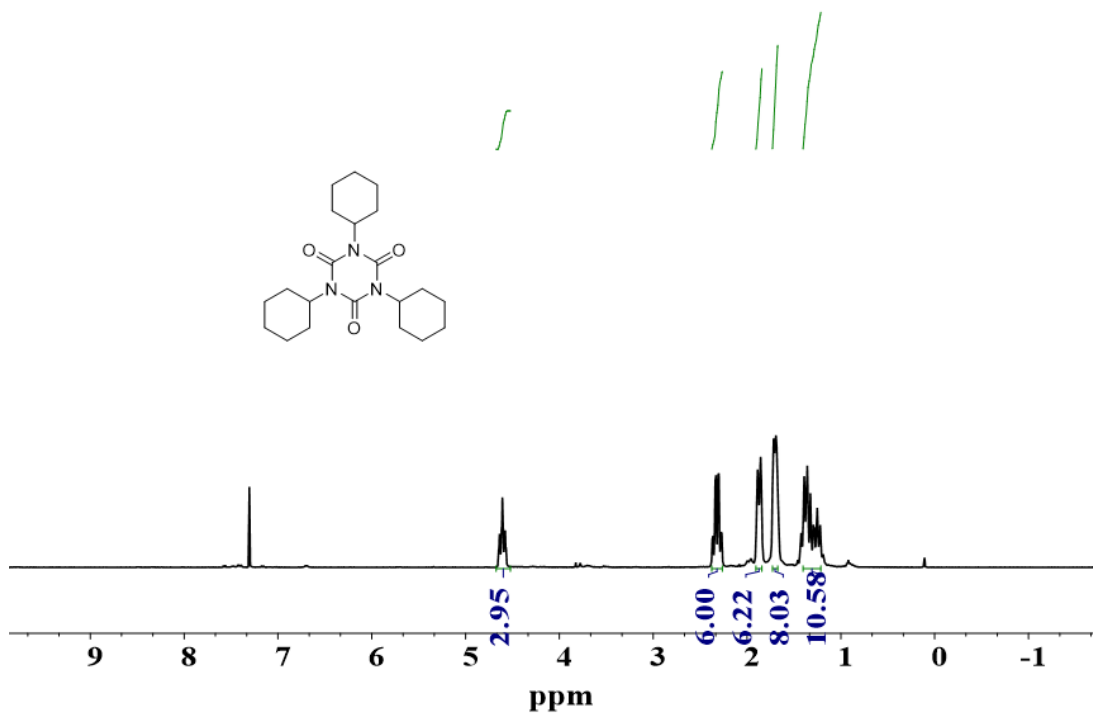

**Fig S22.** <sup>1</sup>H NMR spectrum of **12a** (500 MHz, chloroform-*d*).

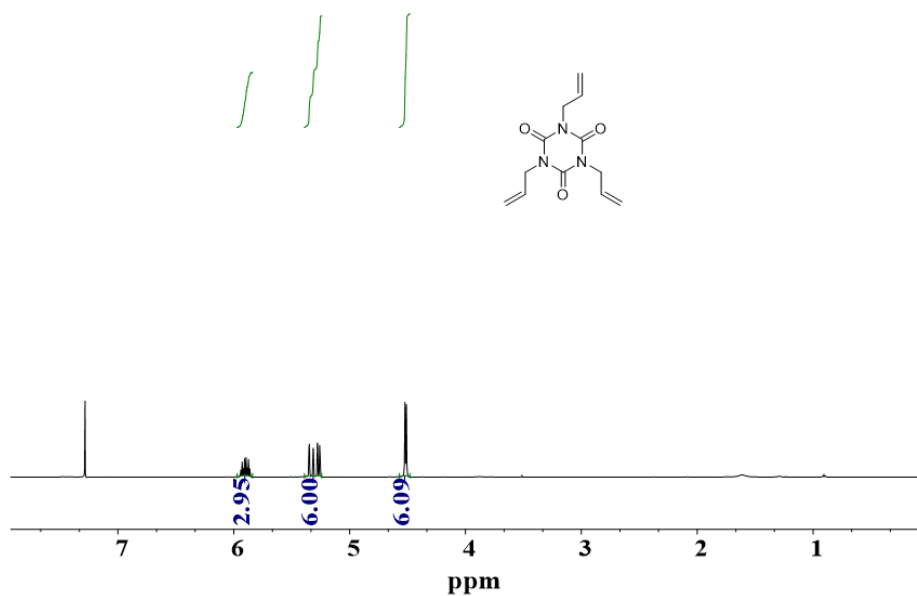

**Fig S23.** <sup>1</sup>H NMR spectrum of **13a** (500 MHz, chloroform-*d*).

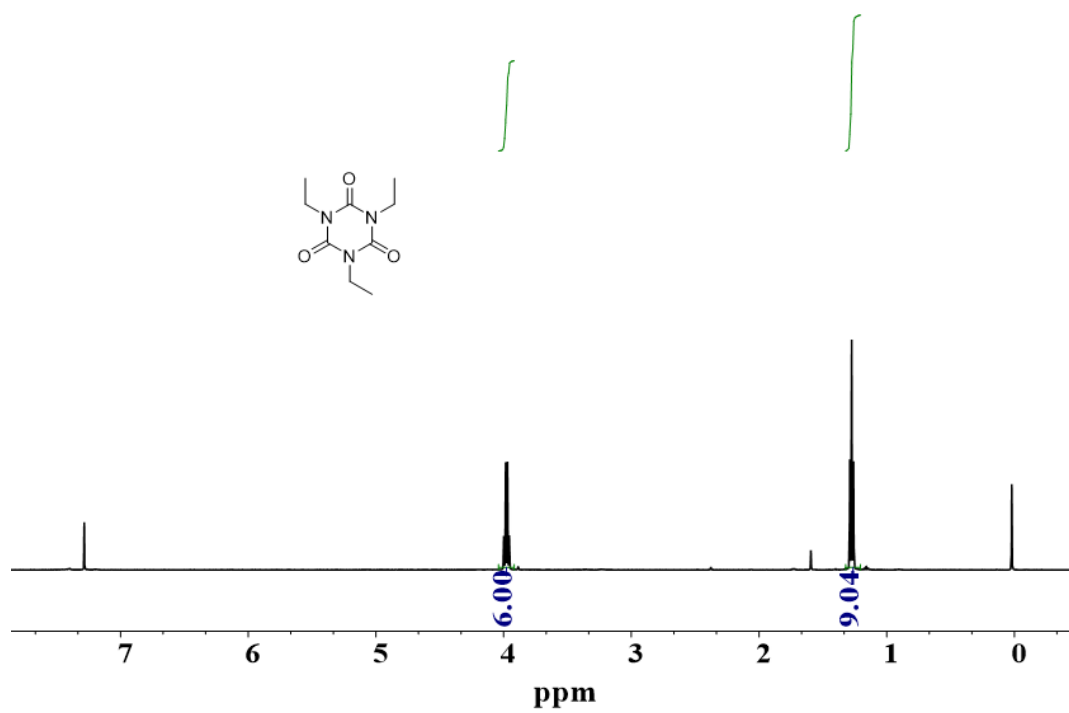

**Fig S24.**  $^1\text{H}$  NMR spectrum of **14a** (500 MHz,  $\text{chloroform-}d$ ).



## 8. X-ray diffraction data

**Table S5. Crystal data and structure refinement for INT<sub>39</sub>·C<sub>6</sub>H<sub>5</sub>F.**

| Compound                                     | INT <sub>39</sub> ·C <sub>6</sub> H <sub>5</sub> F                |
|----------------------------------------------|-------------------------------------------------------------------|
| Empirical formula                            | C <sub>33</sub> H <sub>31</sub> F <sub>2</sub> N <sub>3</sub> O   |
| Formula weight                               | 523.63                                                            |
| Temperature                                  | 273(2) K                                                          |
| Wavelength, Å                                | 0.71073                                                           |
| Crystal system,                              | Triclinic                                                         |
| Space group                                  | <i>P</i> -1                                                       |
| <i>a</i> , Å                                 | 10.2304(11)                                                       |
| <i>b</i> , Å                                 | 10.8156(11)                                                       |
| <i>c</i> , Å                                 | 13.0482(14)                                                       |
| $\alpha$ , deg.                              | 84.556(2)                                                         |
| $\beta$ , deg.                               | 73.203(2)                                                         |
| $\gamma$ , deg.                              | 88.712(2)                                                         |
| <i>V</i> , Å <sup>3</sup>                    | 1375.9(3)                                                         |
| <i>Z</i>                                     | 2                                                                 |
| <i>D</i> <sub>calc</sub> , g/cm <sup>3</sup> | 1.264                                                             |
| Absorption coefficient, mm <sup>-1</sup>     | 0.086                                                             |
| <i>F</i> (000)                               | 452                                                               |
| Crystal size, mm                             | 0.26 x 0.24 x 0.20                                                |
| $\theta$ range, deg.                         | 1.64 to 26.38                                                     |
| Limiting indices                             | -12 ≤ <i>h</i> ≤ 12<br>-13 ≤ <i>k</i> ≤ 10<br>-15 ≤ <i>l</i> ≤ 16 |
| Reflections collected / unique               | 7943                                                              |
| Independent reflns                           | 5475<br>[ <i>R</i> (int) = 0.0178]                                |
| Absorption correction                        | None                                                              |
| Data/restraints/para's                       | 5475 / 0 / 356                                                    |
| Goodness-of-fit on <i>F</i> <sup>2</sup>     | 1.059                                                             |
| Final <i>R</i> indices                       | <i>R</i> 1 = 0.0574                                               |
| [ <i>I</i> > 2σ ( <i>I</i> )] <sup>[a]</sup> | w <i>R</i> 2 = 0.1541                                             |

$R$  indices (all data) <sup>[a]</sup>  $R1 = 0.0832$ ,  $wR2 = 0.1808$   
 $\text{peak}_{\text{max}}/\text{hole}_{\text{min}}$  ( $\text{e } \text{\AA}^{-3}$ )  $0.545/-0.324$   
[\[a\]](#)  $R1 = \Sigma||F_o|-|F_c||/\Sigma|F_o|$ ;  $wR2 = \{\Sigma[w(F_o^2-F_c^2)^2]/\Sigma[w(F_o^2)^2]\}^{1/2}$

**Table S6. Bond lengths [ $\text{\AA}$ ] for  $\text{INT}_{39} \cdot \text{C}_6\text{H}_5\text{F}$ .**

|             |          |             |          |
|-------------|----------|-------------|----------|
| C(1)-O(1)   | 1.256(3) | C(16)-C(21) | 1.393(3) |
| C(1)-N(1)   | 1.312(3) | C(16)-C(17) | 1.396(3) |
| C(1)-C(2)   | 1.565(3) | C(17)-C(18) | 1.383(3) |
| C(2)-C(7)   | 1.518(3) | C(18)-C(19) | 1.393(4) |
| C(2)-C(4)   | 1.534(3) | C(19)-C(20) | 1.382(4) |
| C(2)-C(3)   | 1.542(3) | C(20)-C(21) | 1.384(3) |
| C(5)-N(3)   | 1.470(3) | C(22)-C(23) | 1.393(3) |
| C(6)-N(2)   | 1.465(3) | C(22)-C(27) | 1.397(3) |
| C(7)-N(2)   | 1.348(3) | C(22)-N(1)  | 1.412(3) |
| C(7)-N(3)   | 1.348(3) | C(23)-C(24) | 1.385(3) |
| C(8)-C(9)   | 1.361(3) | C(24)-C(25) | 1.363(3) |
| C(8)-N(2)   | 1.390(3) | C(25)-C(26) | 1.368(4) |
| C(8)-C(10)  | 1.477(3) | C(25)-F(1)  | 1.371(3) |
| C(9)-N(3)   | 1.393(3) | C(26)-C(27) | 1.382(3) |
| C(9)-C(16)  | 1.478(3) | C(28)-C(29) | 1.377(4) |
| C(10)-C(15) | 1.386(3) | C(28)-C(33) | 1.386(4) |
| C(10)-C(11) | 1.400(3) | C(29)-C(30) | 1.377(4) |
| C(11)-C(12) | 1.377(4) | C(30)-F(2)  | 1.344(3) |

|                   |            |                   |            |
|-------------------|------------|-------------------|------------|
| C(12)-C(13)       | 1.380(4)   | C(30)-C(31)       | 1.371(4)   |
| C(13)-C(14)       | 1.362(4)   | C(31)-C(32)       | 1.362(4)   |
| C(14)-C(15)       | 1.392(4)   | C(32)-C(33)       | 1.377(5)   |
| O(1)-C(1)-N(1)    | 131.6(2)   | C(17)-C(18)-C(19) | 120.1(2)   |
| O(1)-C(1)-C(2)    | 113.82(18) | C(20)-C(19)-C(18) | 119.8(2)   |
| N(1)-C(1)-C(2)    | 114.55(18) | C(19)-C(20)-C(21) | 120.2(2)   |
| C(7)-C(2)-C(4)    | 109.04(19) | C(20)-C(21)-C(16) | 120.6(2)   |
| C(7)-C(2)-C(3)    | 114.37(18) | C(23)-C(22)-C(27) | 116.8(2)   |
| C(4)-C(2)-C(3)    | 109.0(2)   | C(23)-C(22)-N(1)  | 127.17(19) |
| C(7)-C(2)-C(1)    | 105.87(17) | C(27)-C(22)-N(1)  | 116.03(19) |
| C(4)-C(2)-C(1)    | 115.06(17) | C(24)-C(23)-C(22) | 121.5(2)   |
| C(3)-C(2)-C(1)    | 103.53(19) | C(25)-C(24)-C(23) | 119.2(2)   |
| N(2)-C(7)-N(3)    | 106.61(19) | C(24)-C(25)-C(26) | 122.0(2)   |
| N(2)-C(7)-C(2)    | 124.19(18) | C(24)-C(25)-F(1)  | 118.7(2)   |
| N(3)-C(7)-C(2)    | 129.2(2)   | C(26)-C(25)-F(1)  | 119.3(2)   |
| C(9)-C(8)-N(2)    | 106.7(2)   | C(25)-C(26)-C(27) | 118.4(2)   |
| C(9)-C(8)-C(10)   | 130.2(2)   | C(26)-C(27)-C(22) | 122.2(2)   |
| N(2)-C(8)-C(10)   | 123.08(19) | C(29)-C(28)-C(33) | 121.1(3)   |
| C(8)-C(9)-N(3)    | 106.79(19) | C(28)-C(29)-C(30) | 117.0(3)   |
| C(8)-C(9)-C(16)   | 129.9(2)   | F(2)-C(30)-C(31)  | 118.3(3)   |
| N(3)-C(9)-C(16)   | 123.32(18) | F(2)-C(30)-C(29)  | 118.6(3)   |
| C(15)-C(10)-C(11) | 118.7(2)   | C(31)-C(30)-C(29) | 123.2(3)   |

---

|                   |            |                   |            |
|-------------------|------------|-------------------|------------|
| C(15)-C(10)-C(8)  | 121.3(2)   | C(32)-C(31)-C(30) | 118.5(3)   |
| C(11)-C(10)-C(8)  | 119.9(2)   | C(9)-N(3)-C(5)    | 122.91(18) |
| C(12)-C(11)-C(10) | 120.6(2)   | C(31)-C(32)-C(33) | 120.6(3)   |
| C(11)-C(12)-C(13) | 120.1(3)   | C(32)-C(33)-C(28) | 119.5(3)   |
| C(14)-C(13)-C(12) | 120.0(3)   | C(1)-N(1)-C(22)   | 120.34(18) |
| C(13)-C(14)-C(15) | 120.9(3)   | C(7)-N(2)-C(8)    | 110.07(17) |
| C(10)-C(15)-C(14) | 119.7(2)   | C(7)-N(2)-C(6)    | 126.37(19) |
| C(21)-C(16)-C(17) | 118.9(2)   | C(8)-N(2)-C(6)    | 123.4(2)   |
| C(21)-C(16)-C(9)  | 121.1(2)   | C(7)-N(3)-C(9)    | 109.80(17) |
| C(17)-C(16)-C(9)  | 120.00(19) | C(7)-N(3)-C(5)    | 125.76(18) |
| C(18)-C(17)-C(16) | 120.4(2)   |                   |            |

---

## 9. References

1. W. C. Chen, J. S. Shen, T. Jurca, C. J. Peng, Y. H. Lin, Y. P. Wang, W. C. Shih, G. P. Yap and T. G. Ong, *Angew.Chem. Int.Ed.*, 2015, **54**, 15207-15212.
2. W. Zhao, Q. Wang, J. He and Y. Zhang, *Polym. Chem.*, 2019, **10**, 4328-4335
3. Q. Wang, W. Zhao, S. Zhang, J. He, Y. Zhang and E. Y. X. Chen, *ACS Catal.*, 2018, **8**, 3571-3578.
4. H. A. Duong, M. J. Cross and J. Louie, *Org. Lett.*, 2004, **6**, 4679-4681.
5. F. M. Moghaddam, M. G. Dekamin, M. S. Khajavi and SeifollahJalili, *Bull. Chem. Soc. Jpn.*, 2002, **75**, 851-852.
6. M. G. Dekamin, K. Varmira, M. Farahmand, S. Sagheb-Asl and Z. Karimi, *Catal. Commun.*, 2010, **12**, 226-230.
7. M. G. Dekamin, S. Mallakpour † and M. Ghassemi, *Synth. Commun.*, 2005, **35**, 427-434.

8. A. G. Giuglio-Tonolo, C. Spitz, T. Terme and P. Vanelle, *Tetrahedron Lett.*, 2014, **55**, 2700-2702.
9. H.-M. Wang, H.-X. Li, X.-Y. Yu, Z.-G. Ren and J.-P. Lang, *Tetrahedron*, 2011, **67**, 1530-1535.
10. D. Liu, X. Wei, J. Shi, Z. Guo and M. Lappert, *Synlett*, 2011, **2011**, 1937-1939.
11. A. Hernan-Gomez, T. D. Bradley, A. R. Kennedy, Z. Livingstone, S. D. Robertson and E. Hevia, *Chem. Commun.*, 2013, **49**, 8659-8661.
